# Supplementary material for: The serotonin receptor 5-HT2A modulates lifespan and protein feeding in Drosophila melanogaster
Source: PubMed Central journal article supplement (PMC9751412; doi:10.3389/fragi.2022.1068455), 2022-12-01

# Fig. 1 Supplement

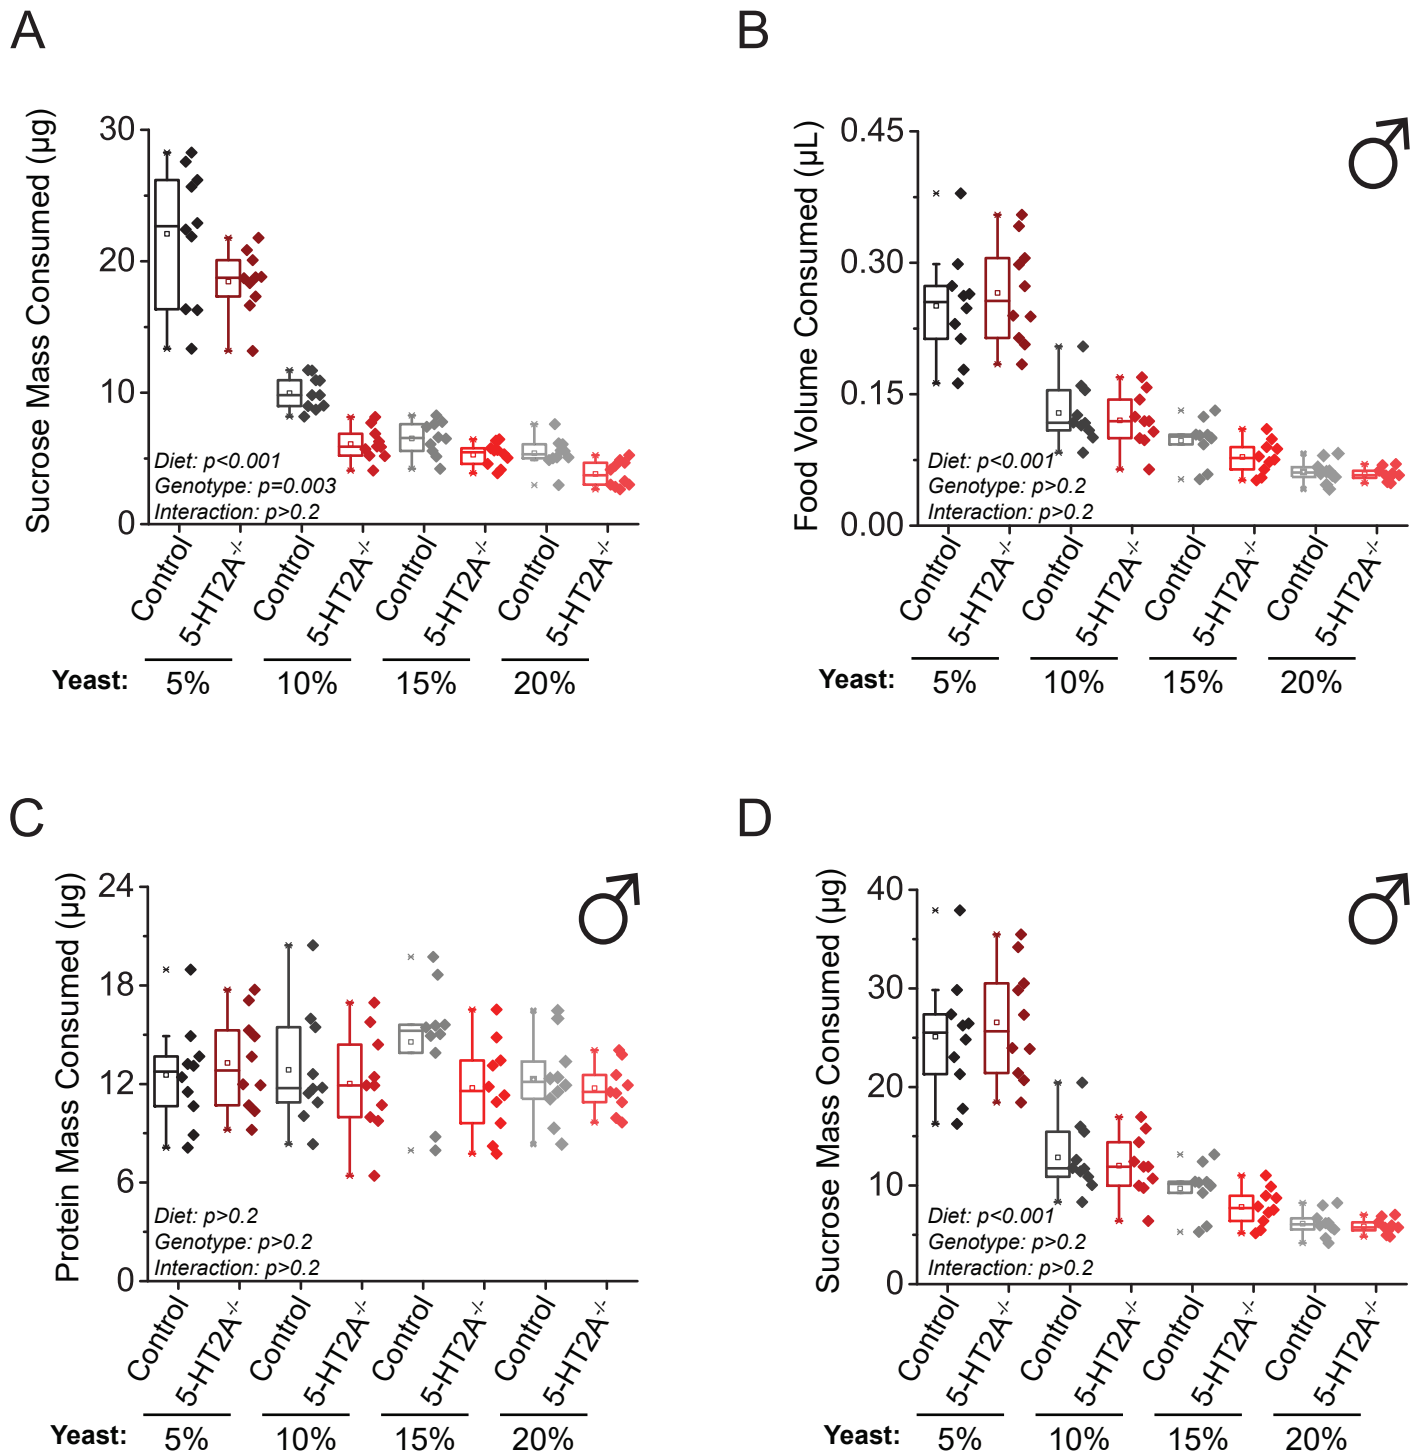

Supplement: Image1.pdf [file Image1.pdf]
